# Supplementary material for: A Systematic Review on Water Fluoride Levels Causing Dental Fluorosis
Source: MDPI journal article supplement (doi:10.3390/su151612227), 2023-08-10
Supplement: s1 [file s1]

Archive with 1 entries (1 files):
- sustainability-2451486-supplementary.pdf
